# Supplementary material for: Unequal Recombination and Evolution of the Mating-Type (MAT) Loci in the Pathogenic Fungus Grosmannia clavigera and Relatives
Source: PubMed Central journal article supplement (PMC3583454; doi:10.1534/g3.112.004986), 2013-03-01
Supplement: supp_3.3.465_004986SI.pdf [file supp_3.3.465_004986SI.pdf]

**Title: Unequal recombination and evolution of the mating-type (*MAT*) loci in the pathogenic fungus *Grosmannia clavigera* and relatives**

Clement K.-M. Tsui,<sup>\*,1</sup> Scott DiGuistini,<sup>§</sup> Ye Wang,<sup>§</sup> Nicolas Feau,<sup>\*</sup> Braham Dhillon,<sup>\*</sup> Jörg Bohlmann,<sup>\*,‡</sup> and Richard C. Hamelin<sup>\*,\*</sup>

<sup>\*</sup>Department of Forest Sciences, The University of British Columbia, Vancouver, BC, Canada V6T 1Z4

<sup>§</sup>Department of Wood Science, The University of British Columbia, Vancouver, BC, Canada V6T 1Z4

<sup>‡</sup>Michael Smith Laboratory, The University of British Columbia, Vancouver, BC, Canada V6T 1Z4

<sup>\*</sup>Natural Resources Canada, Laurentian Forestry Centre, 1055 du P.E.P.S., Québec, QC, Canada G1V 4C7

**DOI: 10.1534/g3.112.004986**

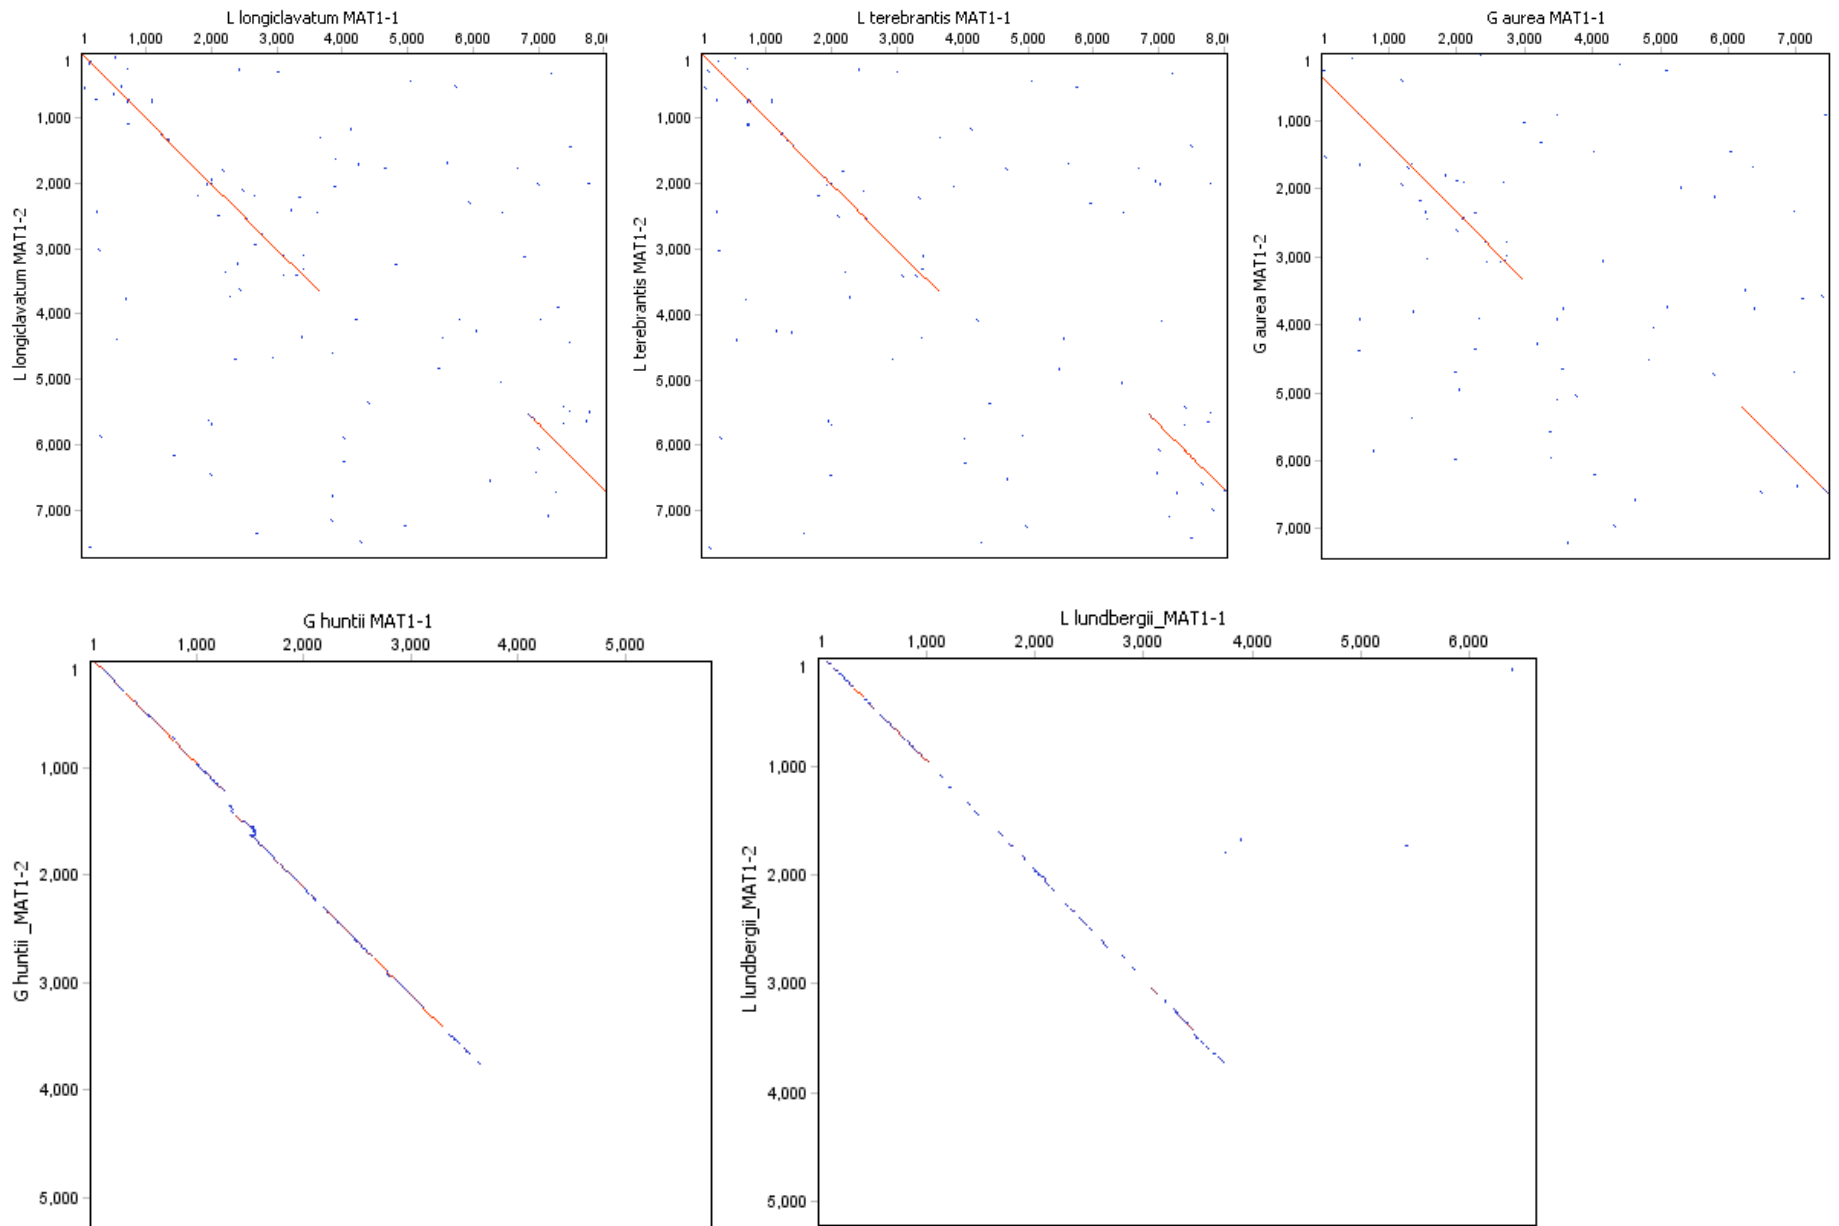

**Figure S1** Dotplot analyses of mating-type idiomorphs in *L. longiclavatum*, *L. terebrantis*, *G. aurea*, *G. huntii*, and *L. lundbergii*.

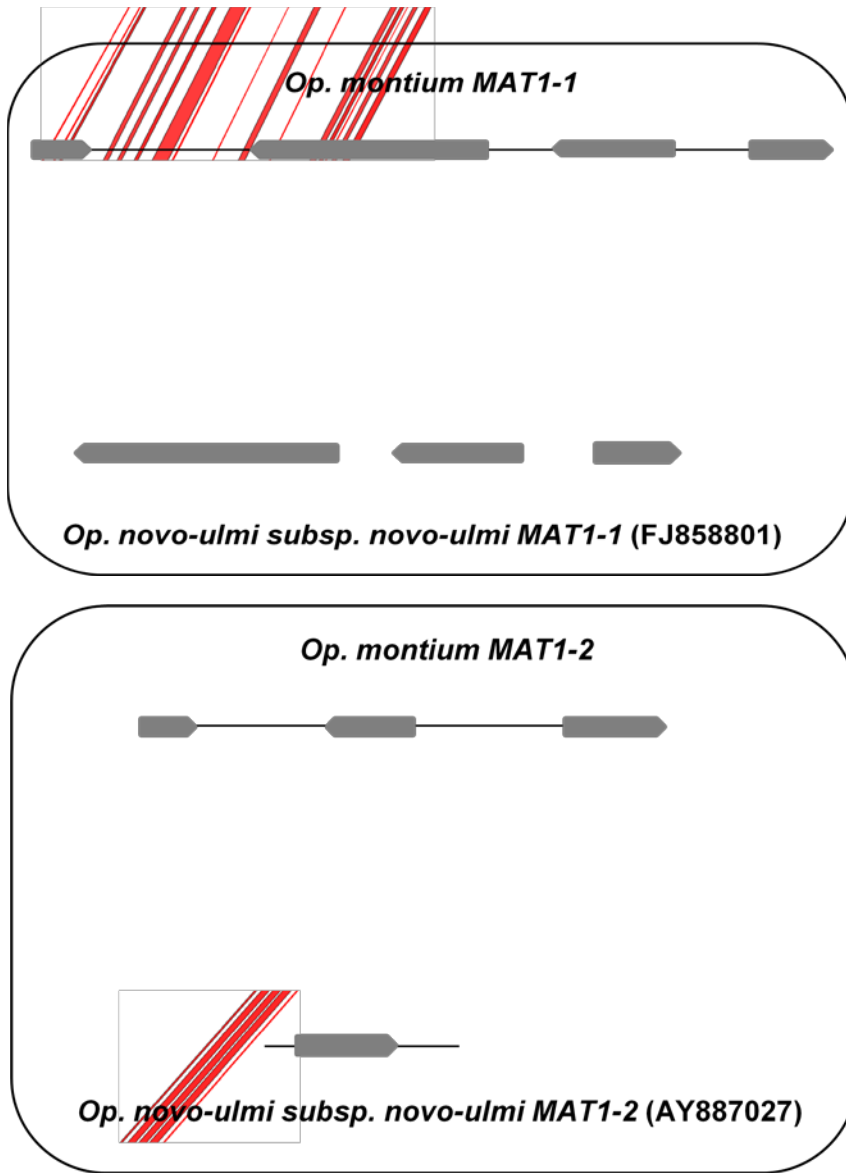

**Figure S2** Homology between the *MAT* loci of *O. montium* and *O. novo-ulmi* subsp. *novo-ulmi*. The diagram was prepared from the output of Artemis Comparison Tool.

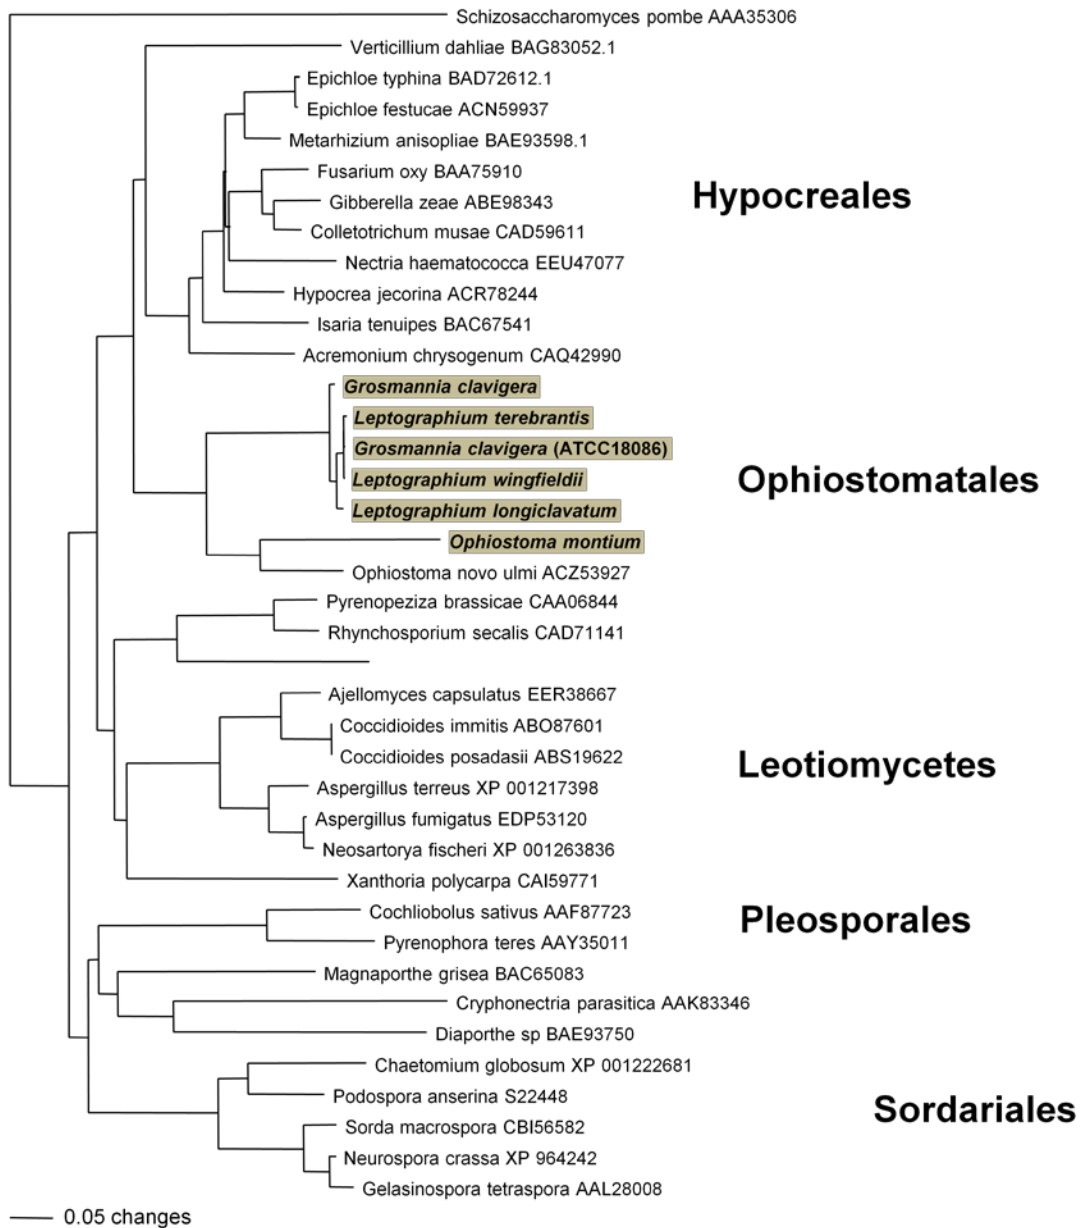

**Figure S3** A distance tree generated from MEGA showing the phylogenetic relationships among ascomycetes inferred from the  $\alpha$ -box domain of the MAT1-1-1 (75 amino acid characters). Number on branches indicated bootstrap support over 60% (1000 pseudoreplicates) from neighbor-joining algorithm.

(a) *MAT1-1-2*

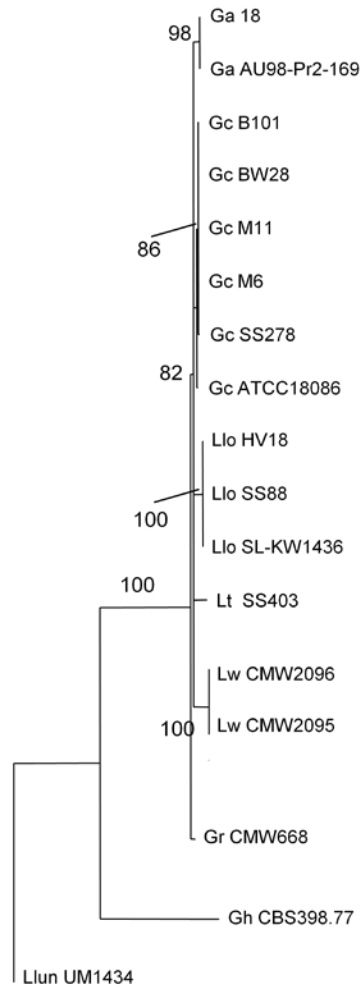

- 5 changes

(b) *MAT1-1-3*

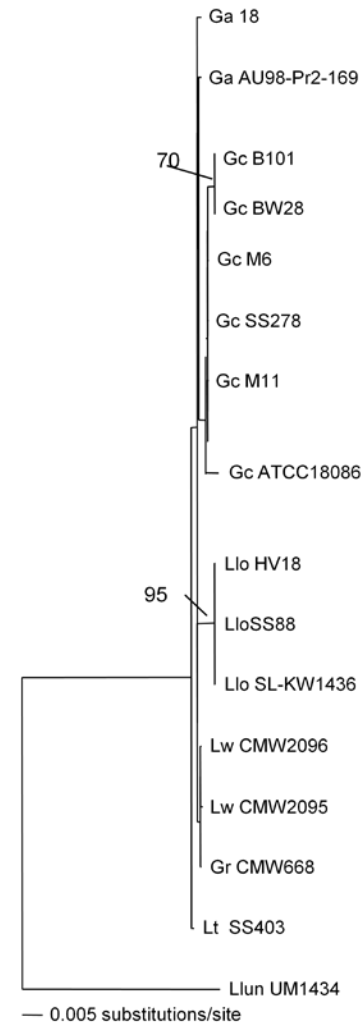

(c) *MAT1-2-1*

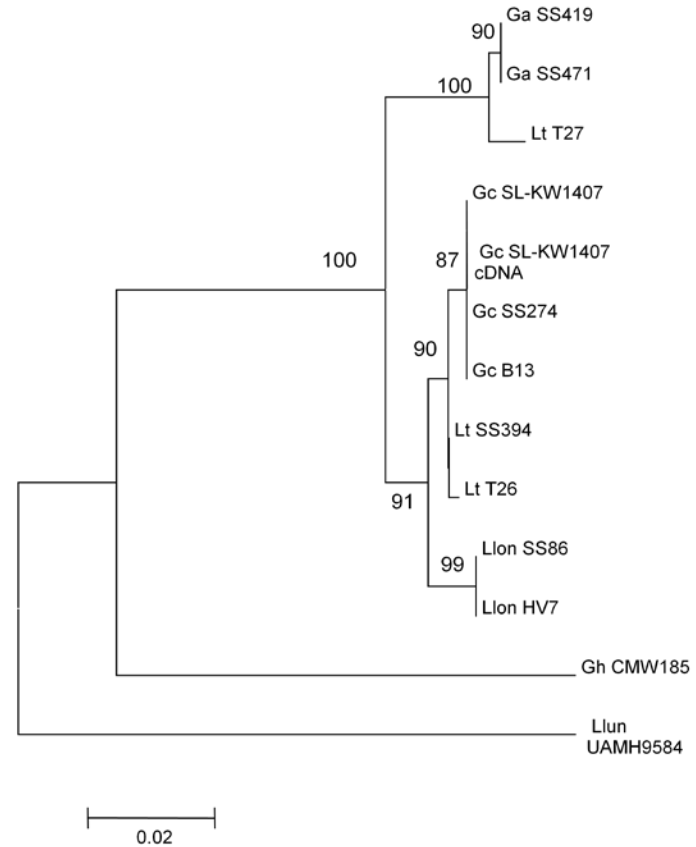

**Figure S4** Gene genealogies of the *MAT1-1-2* (1045 characters a maximum parsimony tree), *MAT1-1-3* (574 characters, a neighbor-joining tree), and *MAT1-2-1* (858 characters, a neighbor-joining tree) demonstrating the phylogenetic relationships among *G. clavigera* and related species.

**(a) SLA****(b) APN****(c) COX13**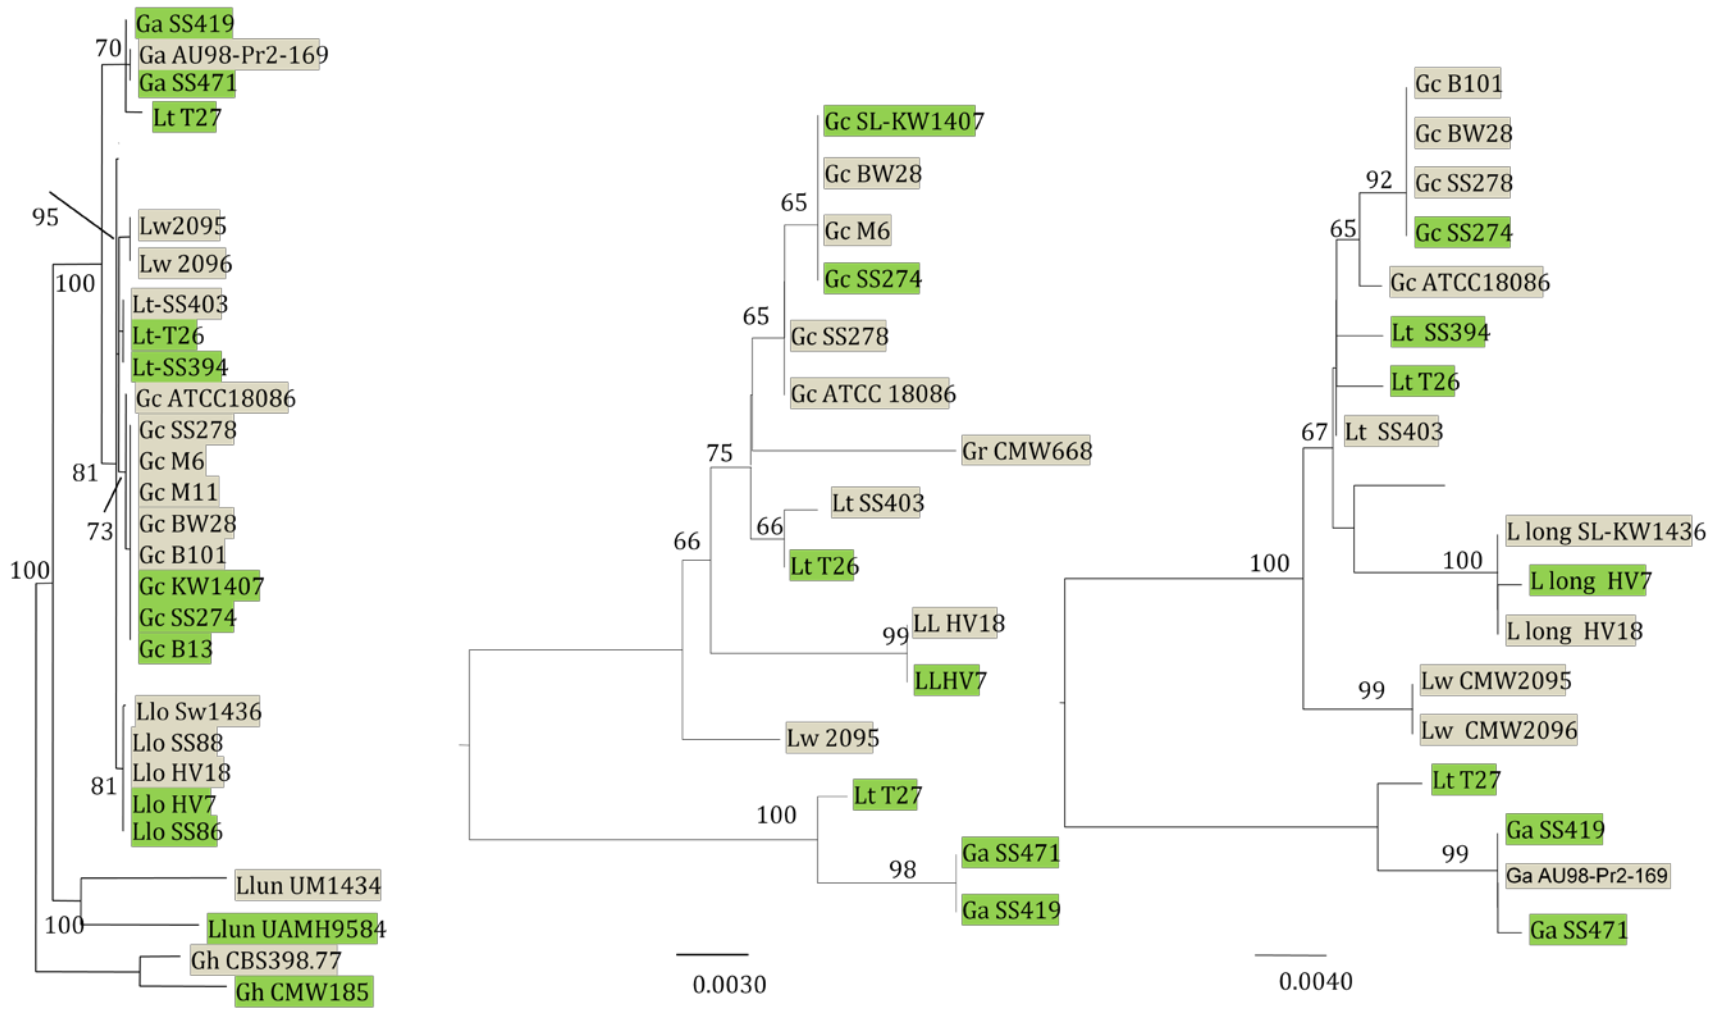

— 5 changes

**Figure S5** Gene genealogies of the nucleotide sequences of (A) *SLA* (898 characters, a maximum parsimony tree), (B) *COX13* (788 characters, a neighbor-joining tree), and (C) *APN* (1444 characters, neighbor-joining tree) genes demonstrating the phylogenetic relationships among *G. clavigera* and related species. *MAT1-2* isolates are indicated in green while *MAT1-1* isolates are highlighted in grey.

**Table S1 List of sequencing primers used in primer walking**

Table S1 is available for download at <http://www.g3journal.org/lookup/suppl/doi:10.1534/g3.112.004986/-/DC1>.

**Table S2** Pair-wise nucleotide similarities among *MAT* idiomorphs of different isolates and species.

**a. Percentage nucleotide similarity among *MAT1-1* idiomorphs**

|                          | 1    | 2    | 3    | 4    | 5    | 6    | 7    | 8    | 9    | 10   | 11   | 12   | 13   | 14   | 15   | 16   | 17 |
|--------------------------|------|------|------|------|------|------|------|------|------|------|------|------|------|------|------|------|----|
| <b>1</b> L lung UM1434   |      |      |      |      |      |      |      |      |      |      |      |      |      |      |      |      |    |
| <b>2</b> Gh CBS398.77    | 77.6 |      |      |      |      |      |      |      |      |      |      |      |      |      |      |      |    |
| <b>3</b> Gc M6           | 76.4 | 75.4 |      |      |      |      |      |      |      |      |      |      |      |      |      |      |    |
| <b>4</b> Gc M11          | 76.5 | 75.3 | 99.8 |      |      |      |      |      |      |      |      |      |      |      |      |      |    |
| <b>5</b> Gc SS278        | 76.4 | 75.2 | 99.9 | 99.8 |      |      |      |      |      |      |      |      |      |      |      |      |    |
| <b>6</b> Gc BW28         | 76.4 | 75.3 | 99.9 | 99.8 | 100  |      |      |      |      |      |      |      |      |      |      |      |    |
| <b>7</b> Gc B101         | 76.4 | 75.3 | 99.9 | 99.8 | 100  | 100  |      |      |      |      |      |      |      |      |      |      |    |
| <b>8</b> Gc ATCC 18086   | 76.2 | 75.1 | 98.9 | 98.8 | 99   | 99   | 99   |      |      |      |      |      |      |      |      |      |    |
| <b>9</b> Lw CMW 2096     | 76.3 | 74.9 | 98.1 | 98.1 | 98.2 | 98.7 | 98.7 | 98.5 |      |      |      |      |      |      |      |      |    |
| <b>10</b> Lw CMW 2095    | 76.4 | 75.1 | 98.6 | 98.6 | 98.7 | 98.7 | 98.7 | 98.5 | 99.9 |      |      |      |      |      |      |      |    |
| <b>11</b> Ga OA18_A27    | 78.4 | 76.6 | 86.8 | 86.8 | 86.9 | 97.1 | 97.1 | 97.2 | 86.8 | 97.1 |      |      |      |      |      |      |    |
| <b>12</b> Ga AU98-Pr2    | 73.8 | 72.7 | 87.5 | 87.4 | 87.5 | 96.1 | 96.1 | 95.8 | 87.5 | 96.1 | 99.9 |      |      |      |      |      |    |
| <b>13</b> L lo SS88      | 76.1 | 74.8 | 97.7 | 97.7 | 97.8 | 97.9 | 97.9 | 97.7 | 97.7 | 98   | 96.2 | 95.1 |      |      |      |      |    |
| <b>14</b> L lo SL-KW1436 | 76   | 74.7 | 97.8 | 97.8 | 97.9 | 97.9 | 97.9 | 97.6 | 97.8 | 97.9 | 96.6 | 95.4 | 100  |      |      |      |    |
| <b>15</b> L lo HV18      | 76.1 | 74.9 | 97.9 | 97.8 | 97.9 | 97.9 | 97.9 | 97.7 | 97.9 | 98   | 96.7 | 95.4 | 99.9 | 99.9 |      |      |    |
| <b>16</b> Lt SS403       | 76.5 | 75.2 | 98.6 | 98.6 | 98.7 | 98.9 | 98.9 | 98.6 | 98.8 | 99   | 96.8 | 96   | 97.9 | 98   | 98.1 |      |    |
| <b>17</b> Gr CMW668      | 76.7 | 75.2 | 98.2 | 98.2 | 98.3 | 98.3 | 98.3 | 97.9 | 98.1 | 98.2 | 97.1 | 95.5 | 97.8 | 97.7 | 97.8 | 98.4 |    |



**b. Percentage nucleotide similarity among *MAT1-2* idiomorphs**

|                        | 1    | 2    | 3    | 4    | 5    | 6    | 7    | 8    | 9    | 10   | 11   | 12 |
|------------------------|------|------|------|------|------|------|------|------|------|------|------|----|
| <b>1 Llun UAMH9584</b> |      |      |      |      |      |      |      |      |      |      |      |    |
| <b>2 Gh CMW185</b>     | 71.9 |      |      |      |      |      |      |      |      |      |      |    |
| <b>3 Gc SI-KW1407</b>  | 74   | 72.9 |      |      |      |      |      |      |      |      |      |    |
| <b>4 Gc SS274</b>      | 74   | 72.9 | 100  |      |      |      |      |      |      |      |      |    |
| <b>5 Gc B13</b>        | 74   | 72.9 | 99.9 | 99.9 |      |      |      |      |      |      |      |    |
| <b>6 Ga SS419</b>      | 72.8 | 71.4 | 94.1 | 92.5 | 92.5 |      |      |      |      |      |      |    |
| <b>7 Ga SS 471</b>     | 73.3 | 72.1 | 94.3 | 94.2 | 94.2 | 99.8 |      |      |      |      |      |    |
| <b>8 Llo SS86</b>      | 73.6 | 72.5 | 97.9 | 97.1 | 97.1 | 92.2 | 93.6 |      |      |      |      |    |
| <b>9 Llo HV7</b>       | 73.7 | 72.5 | 98   | 97.9 | 97.8 | 93.4 | 93.6 | 99.9 |      |      |      |    |
| <b>10 Lt SS394</b>     | 74.1 | 72.9 | 99.1 | 98.5 | 98.5 | 92.9 | 94.5 | 97.6 | 98.2 |      |      |    |
| <b>11 Lt T26</b>       | 74   | 72.8 | 98.9 | 98.9 | 98.8 | 94.2 | 94.4 | 98.1 | 98.1 | 99.8 |      |    |
| <b>12 Lt T27</b>       | 71.1 | 69.9 | 94.2 | 91.9 | 91.8 | 97   | 98.4 | 91.5 | 93.4 | 92.4 | 94.2 |    |

**Table S3** Parameter estimates and likelihood values of the various models of codon evolution using CODEML in PAML

| <b>Test of selection on <i>MAT</i> genes among different species</b> |                       |             |                          |            |            |
|----------------------------------------------------------------------|-----------------------|-------------|--------------------------|------------|------------|
|                                                                      | <b>Model</b>          | <b>-lnL</b> | <b>Models comparison</b> | <b>2ΔL</b> | <b>Pr.</b> |
| <b>Full length <i>MAT1-1-1</i></b>                                   | M1a (neutral)         | 2756.64     | M1a vs. M2a              | 2.41       | ns         |
|                                                                      | M2a (selection)       | 2755.43     |                          |            |            |
|                                                                      | M7 (beta)             | 2756.82     | M7 vs. M8                | 2.77       | ns         |
|                                                                      | M8 (beta + $\omega$ ) | 2755.44     |                          |            |            |
| <b>Truncated <i>MAT1-1-1</i></b>                                     | M1a (neutral)         | 2636.82     | M1a vs. M2a              | 0.0        | ns         |
|                                                                      | M2a (selection)       | 2636.82     |                          |            |            |
|                                                                      | M7 (beta)             | 2636.80     | M7 vs. M8                | 0.0        | ns         |
|                                                                      | M8 (beta + $\omega$ ) | 2636.80     |                          |            |            |
| <b><i>MAT1-2-1</i></b>                                               | M1a (neutral)         | 1373.38     | M1a vs. M2a              | 0.95       | ns         |
|                                                                      | M2a (selection)       | 1372.90     |                          |            |            |
|                                                                      | M7 (beta)             | 1373.42     | M7 vs. M8                |            | ns         |
|                                                                      | M8 (beta + $\omega$ ) | 1372.90     |                          |            |            |

⇒ **Nothing significant**

**Table S4 Gene expression level of *MAT1-2-1* and truncated *MAT1-1-1* genes, as well as other major flanking genes along the same chromosome in 12hr control and terpene treatment conditions.** Data extracted from DiGuistini *et al.* (2011).

| Seq. Name          | CMQ_ # | Seq. length | Seq. Description                            | 12hr simple control |                              |                  |        | 12hr terpene treatment |                              |                  |        |
|--------------------|--------|-------------|---------------------------------------------|---------------------|------------------------------|------------------|--------|------------------------|------------------------------|------------------|--------|
|                    |        |             |                                             | Expression values   | Normalized expression values | Total gene reads | RPKM   | Expression values      | Normalized expression values | Total gene reads | RPKM   |
| <b>GLEAN_5 479</b> | 5197   | 3108        | cytoskeleton assembly control protein       | 58.14               | 45.9                         | 271              | 58.14  | 41.09                  | 42.3                         | 49               | 41.09  |
| <b>GLEAN_8 48</b>  | 5309   | 1596        | Predicted protein/truncated <i>MAT1-1-1</i> | 8.77                | 6.9                          | 21               | 8.77   | 3.27                   | 3.4                          | 2                | 3.27   |
| <b>GLEAN_5 480</b> | 5376   | 858         | mating type protein 1-2-1                   | 17.1                | 13.5                         | 22               | 17.1   | 3.04                   | 3.1                          | 1                | 3.04   |
| <b>GLEAN_8 47</b>  | 5208   | 1065        | Predicted protein                           | 0                   | 0                            | 0                | 0      | 0                      | 0                            | 0                | 0      |
| <b>GLEAN_5 481</b> | 5136   | 1392        | Predicted protein                           | 3.83                | 3                            | 8                | 3.83   | 3.74                   | 3.9                          | 2                | 3.74   |
| <b>GLEAN_8 45</b>  | 5282   | 375         | cytochrome c oxidase subunit                | 686.32              | 541.7                        | 386              | 686.32 | 688.03                 | 708.4                        | 99               | 688.03 |
| <b>GLEAN_5 482</b> | 5213   | 1761        | PA-domain protein                           | 45.06               | 35.6                         | 119              | 45.06  | 10.36                  | 10.7                         | 7                | 10.36  |
| <b>GLEAN_8 44</b>  | 5212   | 2388        | DNA lyase                                   | 34.9                | 27.5                         | 125              | 34.9   | 22.92                  | 23.6                         | 21               | 22.92  |
