# Supplementary material for: Unequal Recombination and Evolution of the Mating-Type (MAT) Loci in the Pathogenic Fungus Grosmannia clavigera and Relatives
Source: PubMed Central journal article supplement (PMC3583454; doi:10.1534/g3.112.004986), 2013-03-01
Supplement: supp_3.3.465_FigureS1.pdf [file supp_3.3.465_FigureS1.pdf]

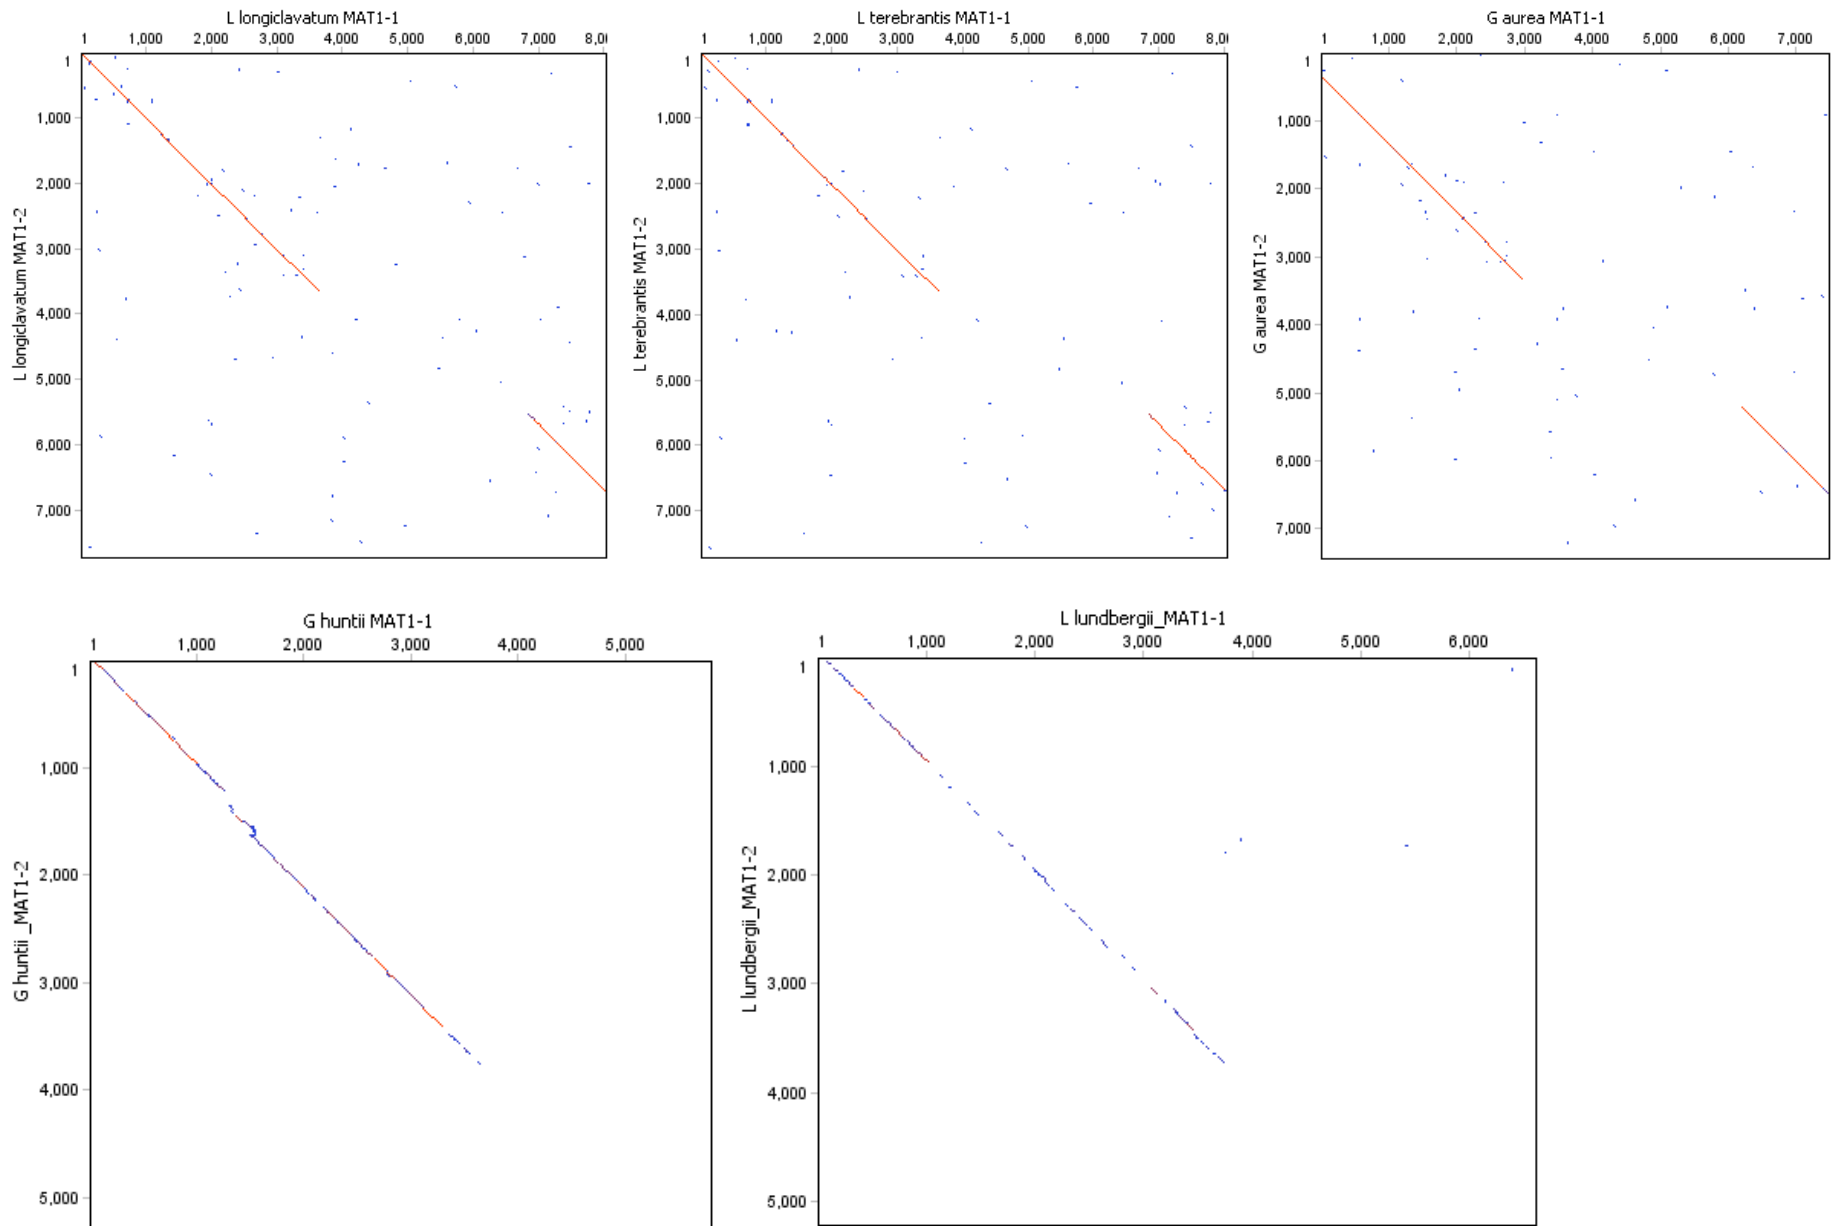

**Figure S1** Dotplot analyses of mating-type idiomorphs in *L. longiclavatum*, *L. terebrantis*, *G. aurea*, *G. huntii*, and *L. lundbergii*.
