# Supplementary material for: Unequal Recombination and Evolution of the Mating-Type (MAT) Loci in the Pathogenic Fungus Grosmannia clavigera and Relatives
Source: PubMed Central journal article supplement (PMC3583454; doi:10.1534/g3.112.004986), 2013-03-01
Supplement: supp_3.3.465_FigureS2.pdf [file supp_3.3.465_FigureS2.pdf]

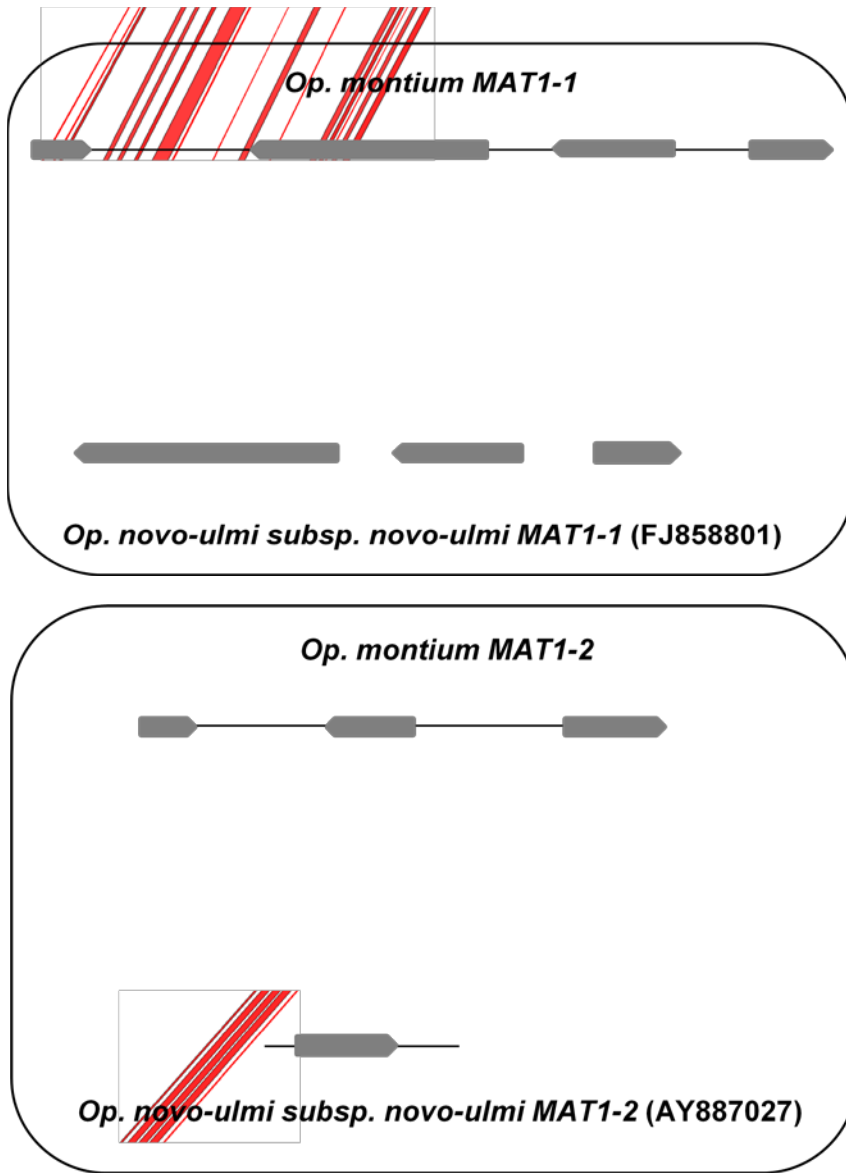

**Figure S2** Homology between the *MAT* loci of *O. montium* and *O. novo-ulmi* subsp. *novo-ulmi*. The diagram was prepared from the output of Artemis Comparison Tool.
