# Supplementary material for: Unequal Recombination and Evolution of the Mating-Type (MAT) Loci in the Pathogenic Fungus Grosmannia clavigera and Relatives
Source: PubMed Central journal article supplement (PMC3583454; doi:10.1534/g3.112.004986), 2013-03-01
Supplement: supp_3.3.465_FigureS3.pdf [file supp_3.3.465_FigureS3.pdf]

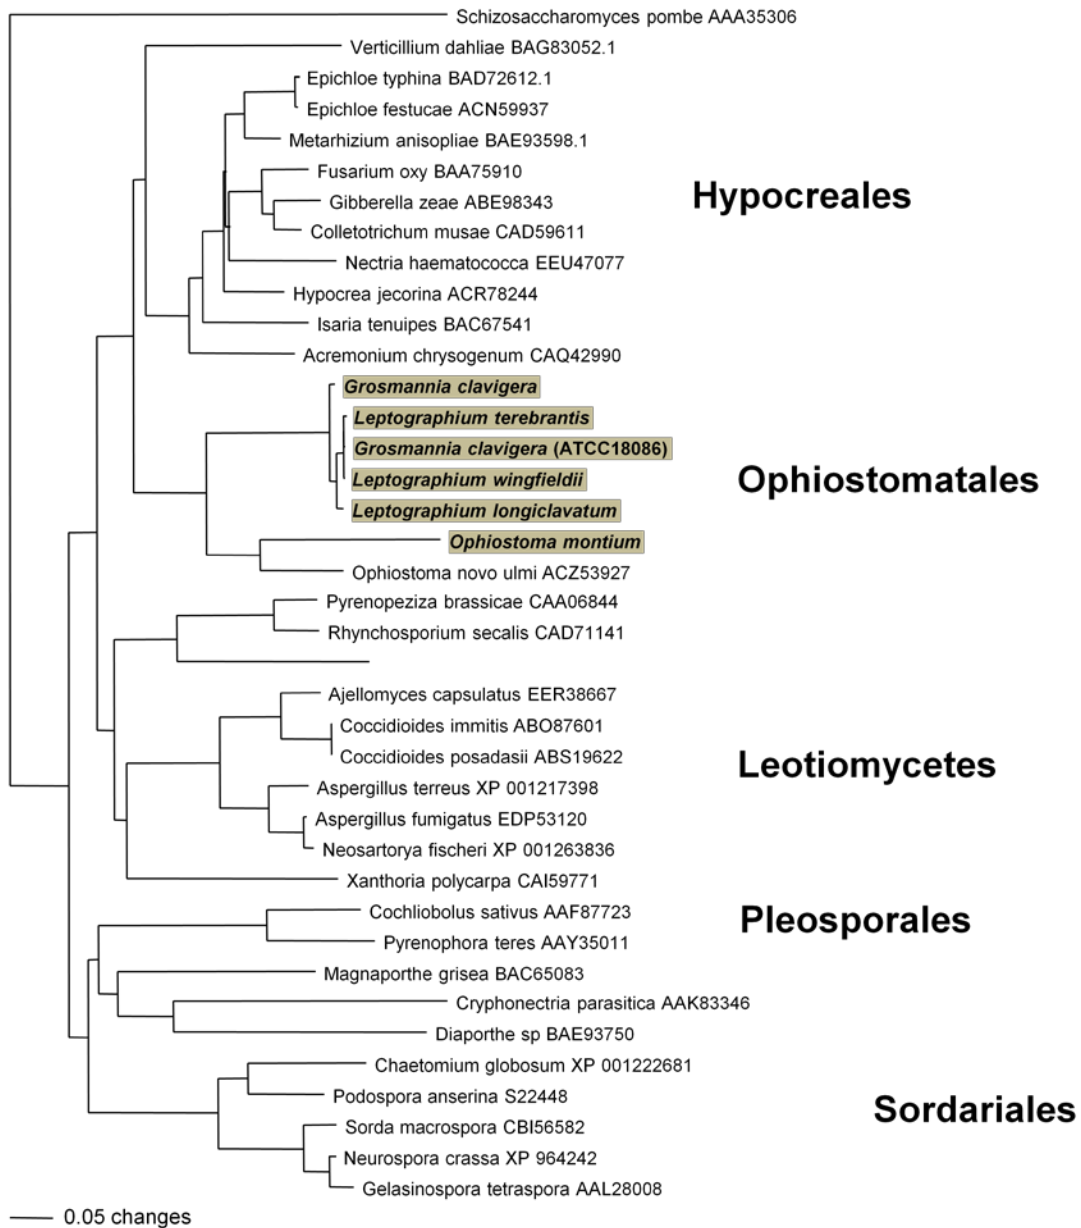

**Figure S3** A distance tree generated from MEGA showing the phylogenetic relationships among ascomycetes inferred from the  $\alpha$ -box domain of the MAT1-1-1 (75 amino acid characters). Number on branches indicated bootstrap support over 60% (1000 pseudoreplicates) from neighbor-joining algorithm.
