# Supplementary material for: Unequal Recombination and Evolution of the Mating-Type (MAT) Loci in the Pathogenic Fungus Grosmannia clavigera and Relatives
Source: PubMed Central journal article supplement (PMC3583454; doi:10.1534/g3.112.004986), 2013-03-01
Supplement: supp_3.3.465_FigureS4.pdf [file supp_3.3.465_FigureS4.pdf]

(a) *MAT1-1-2*

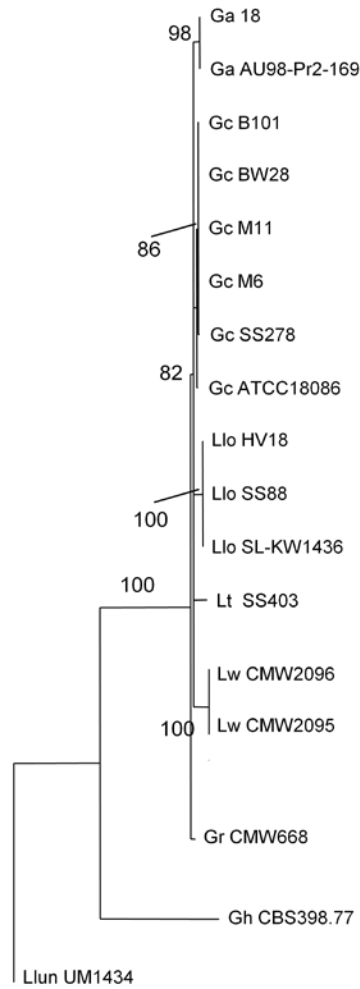

- 5 changes

(b) *MAT1-1-3*

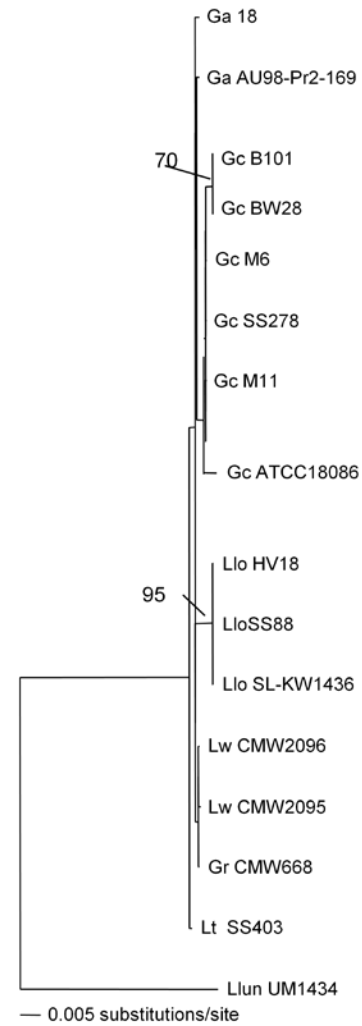

— 0.005 substitutions/site

(c) *MAT1-2-1*

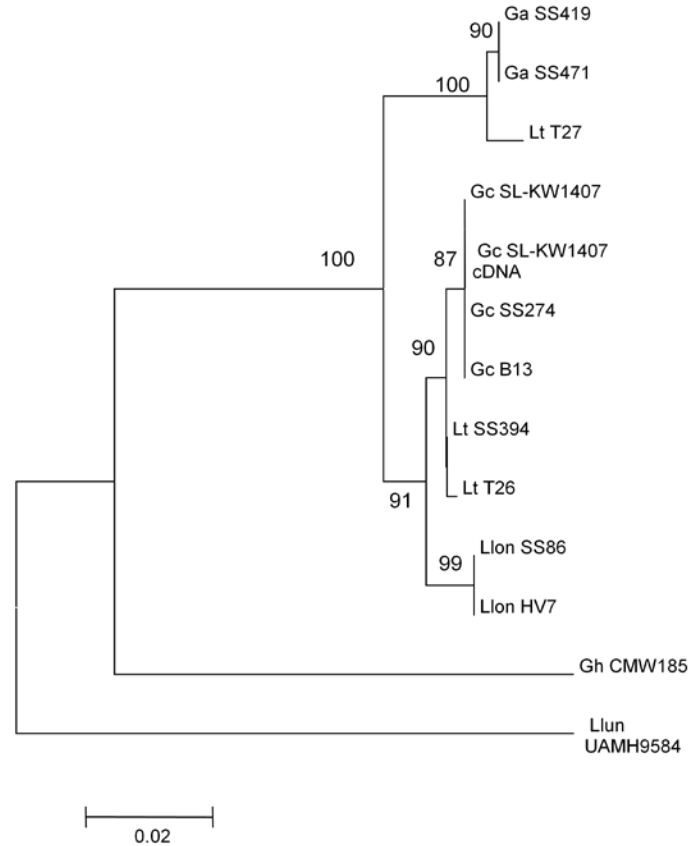

**Figure S4** Gene genealogies of the *MAT1-1-2* (1045 characters a maximum parsimony tree), *MAT1-1-3* (574 characters, a neighbor-joining tree), and *MAT1-2-1* (858 characters, a neighbor-joining tree) demonstrating the phylogenetic relationships among *G. clavigera* and related species.
