# Supplementary material for: Unequal Recombination and Evolution of the Mating-Type (MAT) Loci in the Pathogenic Fungus Grosmannia clavigera and Relatives
Source: PubMed Central journal article supplement (PMC3583454; doi:10.1534/g3.112.004986), 2013-03-01
Supplement: supp_3.3.465_FigureS5.pdf [file supp_3.3.465_FigureS5.pdf]

**(a) SLA****(b) APN****(c) COX13**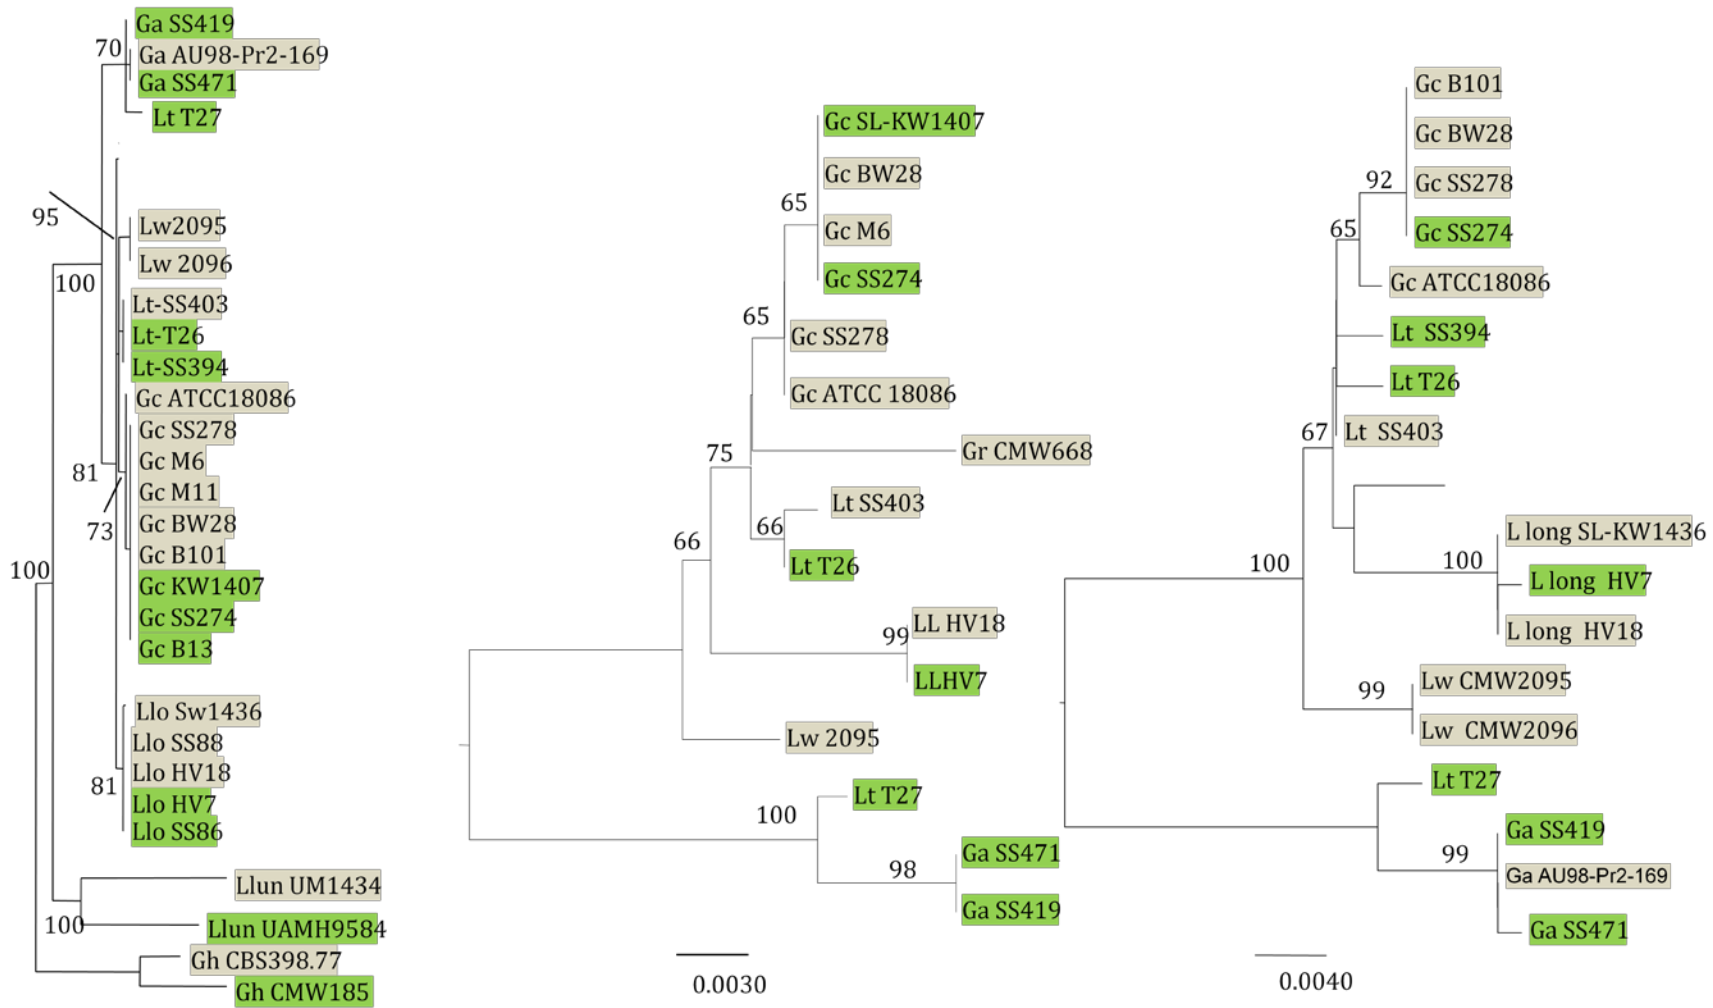

— 5 changes

**Figure S5** Gene genealogies of the nucleotide sequences of (A) *SLA* (898 characters, a maximum parsimony tree), (B) *COX13* (788 characters, a neighbor-joining tree), and (C) *APN* (1444 characters, neighbor-joining tree) genes demonstrating the phylogenetic relationships among *G. clavigera* and related species. *MAT1-2* isolates are indicated in green while *MAT1-1* isolates are highlighted in grey.
