# Supplementary material for: Unequal Recombination and Evolution of the Mating-Type (MAT) Loci in the Pathogenic Fungus Grosmannia clavigera and Relatives
Source: PubMed Central journal article supplement (PMC3583454; doi:10.1534/g3.112.004986), 2013-03-01
Supplement: supp_3.3.465_TableS2.pdf [file supp_3.3.465_TableS2.pdf]

Table S2 Pair-wise nucleotide similarities among *MAT* idiomorphs of different isolates and species.

a. Percentage nucleotide similarity among *MAT1-1* idiomorphs

|           | 1                     | 2    | 3    | 4    | 5    | 6    | 7    | 8    | 9    | 10   | 11   | 12   | 13   | 14   | 15   | 16   | 17   |
|-----------|-----------------------|------|------|------|------|------|------|------|------|------|------|------|------|------|------|------|------|
| <b>1</b>  | <b>L lung UM1434</b>  |      |      |      |      |      |      |      |      |      |      |      |      |      |      |      |      |
| <b>2</b>  | <b>Gh CBS398.77</b>   | 77.6 |      |      |      |      |      |      |      |      |      |      |      |      |      |      |      |
| <b>3</b>  | <b>Gc M6</b>          | 76.4 | 75.4 |      |      |      |      |      |      |      |      |      |      |      |      |      |      |
| <b>4</b>  | <b>Gc M11</b>         | 76.5 | 75.3 | 99.8 |      |      |      |      |      |      |      |      |      |      |      |      |      |
| <b>5</b>  | <b>Gc SS278</b>       | 76.4 | 75.2 | 99.9 | 99.8 |      |      |      |      |      |      |      |      |      |      |      |      |
| <b>6</b>  | <b>Gc BW28</b>        | 76.4 | 75.3 | 99.9 | 99.8 | 100  |      |      |      |      |      |      |      |      |      |      |      |
| <b>7</b>  | <b>Gc B101</b>        | 76.4 | 75.3 | 99.9 | 99.8 | 100  | 100  |      |      |      |      |      |      |      |      |      |      |
| <b>8</b>  | <b>Gc ATCC 18086</b>  | 76.2 | 75.1 | 98.9 | 98.8 | 99   | 99   | 99   |      |      |      |      |      |      |      |      |      |
| <b>9</b>  | <b>Lw CMW 2096</b>    | 76.3 | 74.9 | 98.1 | 98.1 | 98.2 | 98.7 | 98.7 | 98.5 |      |      |      |      |      |      |      |      |
| <b>10</b> | <b>Lw CMW 2095</b>    | 76.4 | 75.1 | 98.6 | 98.6 | 98.7 | 98.7 | 98.7 | 98.5 | 99.9 |      |      |      |      |      |      |      |
| <b>11</b> | <b>Ga OA18_A27</b>    | 78.4 | 76.6 | 86.8 | 86.8 | 86.9 | 97.1 | 97.1 | 97.2 | 86.8 | 97.1 |      |      |      |      |      |      |
| <b>12</b> | <b>Ga AU98-Pr2</b>    | 73.8 | 72.7 | 87.5 | 87.4 | 87.5 | 96.1 | 96.1 | 95.8 | 87.5 | 96.1 | 99.9 |      |      |      |      |      |
| <b>13</b> | <b>L lo SS88</b>      | 76.1 | 74.8 | 97.7 | 97.7 | 97.8 | 97.9 | 97.9 | 97.7 | 97.7 | 98   | 96.2 | 95.1 |      |      |      |      |
| <b>14</b> | <b>L lo SL-KW1436</b> | 76   | 74.7 | 97.8 | 97.8 | 97.9 | 97.9 | 97.9 | 97.6 | 97.8 | 97.9 | 96.6 | 95.4 | 100  |      |      |      |
| <b>15</b> | <b>L lo HV18</b>      | 76.1 | 74.9 | 97.9 | 97.8 | 97.9 | 97.9 | 97.9 | 97.7 | 97.9 | 98   | 96.7 | 95.4 | 99.9 | 99.9 |      |      |
| <b>16</b> | <b>Lt SS403</b>       | 76.5 | 75.2 | 98.6 | 98.6 | 98.7 | 98.9 | 98.9 | 98.6 | 98.8 | 99   | 96.8 | 96   | 97.9 | 98   | 98.1 |      |
| <b>17</b> | <b>Gr CMW668</b>      | 76.7 | 75.2 | 98.2 | 98.2 | 98.3 | 98.3 | 98.3 | 97.9 | 98.1 | 98.2 | 97.1 | 95.5 | 97.8 | 97.7 | 97.8 | 98.4 |

**b. Percentage nucleotide similarity among *MAT1-2* idiomorphs**

|                        | 1    | 2    | 3    | 4    | 5    | 6    | 7    | 8    | 9    | 10   | 11   | 12 |
|------------------------|------|------|------|------|------|------|------|------|------|------|------|----|
| <b>1 Llun UAMH9584</b> |      |      |      |      |      |      |      |      |      |      |      |    |
| <b>2 Gh CMW185</b>     | 71.9 |      |      |      |      |      |      |      |      |      |      |    |
| <b>3 Gc SI-KW1407</b>  | 74   | 72.9 |      |      |      |      |      |      |      |      |      |    |
| <b>4 Gc SS274</b>      | 74   | 72.9 | 100  |      |      |      |      |      |      |      |      |    |
| <b>5 Gc B13</b>        | 74   | 72.9 | 99.9 | 99.9 |      |      |      |      |      |      |      |    |
| <b>6 Ga SS419</b>      | 72.8 | 71.4 | 94.1 | 92.5 | 92.5 |      |      |      |      |      |      |    |
| <b>7 Ga SS 471</b>     | 73.3 | 72.1 | 94.3 | 94.2 | 94.2 | 99.8 |      |      |      |      |      |    |
| <b>8 Llo SS86</b>      | 73.6 | 72.5 | 97.9 | 97.1 | 97.1 | 92.2 | 93.6 |      |      |      |      |    |
| <b>9 Llo HV7</b>       | 73.7 | 72.5 | 98   | 97.9 | 97.8 | 93.4 | 93.6 | 99.9 |      |      |      |    |
| <b>10 Lt SS394</b>     | 74.1 | 72.9 | 99.1 | 98.5 | 98.5 | 92.9 | 94.5 | 97.6 | 98.2 |      |      |    |
| <b>11 Lt T26</b>       | 74   | 72.8 | 98.9 | 98.9 | 98.8 | 94.2 | 94.4 | 98.1 | 98.1 | 99.8 |      |    |
| <b>12 Lt T27</b>       | 71.1 | 69.9 | 94.2 | 91.9 | 91.8 | 97   | 98.4 | 91.5 | 93.4 | 92.4 | 94.2 |    |
