# Supplementary material for: Unequal Recombination and Evolution of the Mating-Type (MAT) Loci in the Pathogenic Fungus Grosmannia clavigera and Relatives
Source: PubMed Central journal article supplement (PMC3583454; doi:10.1534/g3.112.004986), 2013-03-01
Supplement: supp_3.3.465_TableS3.pdf [file supp_3.3.465_TableS3.pdf]

**Table S3** Parameter estimates and likelihood values of the various models of codon evolution using CODEML in PAML

| <b>Test of selection on <i>MAT</i> genes among different species</b> |                 |             |                          |            |            |
|----------------------------------------------------------------------|-----------------|-------------|--------------------------|------------|------------|
|                                                                      | <b>Model</b>    | <b>-lnL</b> | <b>Models comparison</b> | <b>2ΔL</b> | <b>Pr.</b> |
| <b>Full length <i>MAT1-1-1</i></b>                                   | M1a (neutral)   | 2756.64     | M1a vs. M2a              | 2.41       | ns         |
|                                                                      | M2a (selection) | 2755.43     |                          |            |            |
|                                                                      | M7 (beta)       | 2756.82     | M7 vs. M8                | 2.77       | ns         |
|                                                                      | M8 (beta + ω)   | 2755.44     |                          |            |            |
| <b>Truncated <i>MAT1-1-1</i></b>                                     | M1a (neutral)   | 2636.82     | M1a vs. M2a              | 0.0        | ns         |
|                                                                      | M2a (selection) | 2636.82     |                          |            |            |
|                                                                      | M7 (beta)       | 2636.80     | M7 vs. M8                | 0.0        | ns         |
|                                                                      | M8 (beta + ω)   | 2636.80     |                          |            |            |
| <b><i>MAT1-2-1</i></b>                                               | M1a (neutral)   | 1373.38     | M1a vs. M2a              | 0.95       | ns         |
|                                                                      | M2a (selection) | 1372.90     |                          |            |            |
|                                                                      | M7 (beta)       | 1373.42     | M7 vs. M8                |            | ns         |
|                                                                      | M8 (beta + ω)   | 1372.90     |                          |            |            |

⇒ **Nothing significant**
