# Supplementary material for: Unequal Recombination and Evolution of the Mating-Type (MAT) Loci in the Pathogenic Fungus Grosmannia clavigera and Relatives
Source: PubMed Central journal article supplement (PMC3583454; doi:10.1534/g3.112.004986), 2013-03-01
Supplement: supp_3.3.465_TableS4.pdf [file supp_3.3.465_TableS4.pdf]

**Table S4** Gene expression level of *MAT1-2-1* and truncated *MAT1-1-1* genes, as well as other major flanking genes along the same chromosome in 12hr control and terpene treatment conditions. Data extracted from DiGuistini *et al.* (2011).

| Seq. Name          | CMQ_ # | Seq. length | Seq. Description                      | 12hr simple control |                              |                  |        | 12hr terpene treatment |                              |                  |        |
|--------------------|--------|-------------|---------------------------------------|---------------------|------------------------------|------------------|--------|------------------------|------------------------------|------------------|--------|
|                    |        |             |                                       | Expression values   | Normalized expression values | Total gene reads | RPKM   | Expression values      | Normalized expression values | Total gene reads | RPKM   |
| <b>GLEAN_5 479</b> | 5197   | 3108        | cytoskeleton assembly control protein | 58.14               | 45.9                         | 271              | 58.14  | 41.09                  | 42.3                         | 49               | 41.09  |
| <b>GLEAN_8 48</b>  | 5309   | 1596        | Predicted protein/truncated MAT1-1-1  | 8.77                | 6.9                          | 21               | 8.77   | 3.27                   | 3.4                          | 2                | 3.27   |
| <b>GLEAN_5 480</b> | 5376   | 858         | mating type protein 1-2-1             | 17.1                | 13.5                         | 22               | 17.1   | 3.04                   | 3.1                          | 1                | 3.04   |
| <b>GLEAN_8 47</b>  | 5208   | 1065        | Predicted protein                     | 0                   | 0                            | 0                | 0      | 0                      | 0                            | 0                | 0      |
| <b>GLEAN_5 481</b> | 5136   | 1392        | Predicted protein                     | 3.83                | 3                            | 8                | 3.83   | 3.74                   | 3.9                          | 2                | 3.74   |
| <b>GLEAN_8 45</b>  | 5282   | 375         | cytochrome c oxidase subunit          | 686.32              | 541.7                        | 386              | 686.32 | 688.03                 | 708.4                        | 99               | 688.03 |
| <b>GLEAN_5 482</b> | 5213   | 1761        | PA-domain protein                     | 45.06               | 35.6                         | 119              | 45.06  | 10.36                  | 10.7                         | 7                | 10.36  |
| <b>GLEAN_8 44</b>  | 5212   | 2388        | DNA lyase                             | 34.9                | 27.5                         | 125              | 34.9   | 22.92                  | 23.6                         | 21               | 22.92  |
